# Supplementary material for: Evolutionary Patterns and Selective Pressures of Odorant/Pheromone Receptor Gene Families in Teleost Fishes
Source: PLoS One. 2008 Dec 31;3(12):e4083. doi: 10.1371/journal.pone.0004083 (PMC2605262; doi:10.1371/journal.pone.0004083)
Supplement: Text S3 — Names and positions of pufferfish TAAR genes and pseudogenes. (0.03 MB XLS) [file pone.0004083.s003.xls]

## Sheet: Sheet1
Name	Chromosome	Start	End	Ori.	Functionarity
Tn7_3_1Y	3	2455145	2454161	-	Pseudo
Tn7_3_2	3	2457237	2456258	-
Tn7_3_3Y	3	2461819	2460827	-	Pseudo
Tn7_3_4Y	3	2466475	2465495	-	Pseudo
Tn7_3_5	3	2468903	2467924	-
Tn7_14_1	14	831059	830059	-
Tn7_14_2Y	14	839818	839129	-	Pseudo
Tn7_14_3Y	14	843986	842926	-	Pseudo
Tn7_14_4	14	863576	864722	+
Tn7_14_5	14	867071	868217	+
Tn7_14_6	14	870372	869417	-
Tn7_14_7	14	878452	877563	-
Tn7_14_8	14	879932	880786	+
Tn7_Un_1	Un_random	42642623	42643615	+
Tn7_Un_2P	Un_random	42652245	42652754	+	Partial
Tn7_Un_3	Un_random	105520177	105521163	+
Tn7_Un_4	Un_random	105528597	105527603	-
Tn7_Un_5P	Un_random	105533451	105532469	-	Partial
Tn7_Un_6	Un_random	113137367	113136343	-
Tn7_Un_7	Un_random	113715459	113714465	-
Tn7_Un_8Y	Un_random	113727018	113727999	+	Pseudo
Tn7_Un_9P	Un_random	120266499	120266585	+	Partial
Tn7_Un_10	Un_random	126874691	126873670	-
Tn7_Un_11	Un_random	126881642	126880655	-
Tn7_Un_12	Un_random	126901716	126902708	+
Tn7_Un_13	Un_random	126905677	126906666	+
